# Supplementary material for: Triple and quadruple cervical artery dissections: a systematic review of individual patient data
Source: Springer Nature journal article supplement (doi:10.1007/s00415-019-09269-1), 2019-03-23
Supplement: MOESM3 [file 16572072]

## Online Resource

Triple and quadruple cervical artery dissections: a systematic review of individual patient data

Journal of Neurology

Valeria Guglielmi, Jeldican Visser, Marcel Arnold, Hakan Sarikaya, René van den Berg, Paul J. Nederkoorn, Didier Leys, David Calvet, Manja Kloss, Alessandro Pezzini, Turgut Tatlisumak, Sabrina Schilling, Stéphanie Debette, Jonathan M. Coutinho

Correspondence to: Jonathan M. Coutinho, Department of Neurology, Amsterdam UMC, location AMC, Amsterdam, The Netherlands. E-mail: j.coutinho@amc.nl

**Table II** Clinical characteristics, underlying disease/triggering events and outcome in current study, compared to data from CADISP study<sup>1</sup>

|                               | n/N (%)                                          |                                                     |                      | CADISP study <sup>1</sup><br>Double CeAD<br>(N=130) <sup>b</sup> |
|-------------------------------|--------------------------------------------------|-----------------------------------------------------|----------------------|------------------------------------------------------------------|
|                               | Current study<br>Triple/quadruple CeAD<br>(N=96) | CADISP study <sup>1</sup><br>Single CeAD<br>(N=833) | P-value <sup>a</sup> |                                                                  |
| <b>Demographics</b>           |                                                  |                                                     |                      |                                                                  |
| Mean age, y (SD) <sup>c</sup> | 42 (9)                                           | 44 (10)                                             | 0.063                | 43 (10)                                                          |
| Sex (% women)                 | 63/96 (66%)                                      | 351/833 (42%)                                       | <0.001               | 65/130 (50%)                                                     |
| <b>Medical History</b>        |                                                  |                                                     |                      |                                                                  |
| Smoking                       | 20/72 (28%)                                      | 238/822 (29%)                                       | 0.833                | 29/129 (22%)                                                     |
| Hypertension                  | 16/72 (22%)                                      | 206/824 (25%)                                       | 0.601                | 38/129 (29%)                                                     |
| Migraine                      | 25/72 (35%)                                      | 302/820 (37%)                                       | 0.722                | 51/128 (40%)                                                     |
| Diabetes                      | 4/72 (6%)                                        | 16/827 (2%)                                         | 0.137                | 4/129 (3%)                                                       |

|                                       |             |               |        |               |
|---------------------------------------|-------------|---------------|--------|---------------|
| Hypercholesterolemia                  | 12/72 (17%) | 161/818 (20%) | 0.535  | 19/125 (15%)  |
| Clinical characteristics              |             |               |        |               |
| Headache                              | 63/92 (69%) | 542/807 (67%) | 0.799  | 84/128 (66%)  |
| Neck pain                             | 40/92 (44%) | 380/807 (47%) | 0.511  | 76/128 (59%)  |
| Horner syndrome                       | 31/92 (34%) | 237/807 (29%) | 0.390  | 27/128 (21%)  |
| TIA                                   | 17/92 (19%) | 175/833 (21%) | 0.570  | 20/130 (15%)  |
| Cerebral infarct                      | 52/91 (57%) | 547/833 (66%) | 0.106  | 87/130 (67%)  |
| Underlying disease                    |             |               |        |               |
| Fibromuscular dysplasia               | 12/74 (16%) | 23/611 (4%)   | <0.001 | 14/105 (13%)  |
| Hereditary connective tissue disorder | 4/50 (8%)   | 3/808 (0.4%)  | <0.001 | 0/128 (0%)    |
| Triggering events                     |             |               |        |               |
| Recent infection (previous week)      | 16/90 (18%) | 149/813 (18%) | 0.898  | 33/128 (26%)  |
| Recent trauma (previous month)        | 32/90 (35%) | 325/817 (40%) | 0.436  | 57/129 (44%)  |
| Prior cervical manipulation           | 12/90 (13%) | 49/817 (6%)   | 0.008  | 15/129 (12%)  |
| Outcome                               |             |               |        |               |
| mRS 0-2 <sup>d</sup>                  | 65/74 (88%) | 702/797 (88%) | 0.951  | 110/125 (88%) |
| Recurrence of CeAD                    | 2/80 (3%)   | 18/802 (2%)   | 1.000  | 4/127 (3%)    |

<sup>a</sup> Statistical testing performed for comparison between triple/quadruple CeAD patients from current study and single CeAD patients from CADISP study.

<sup>b</sup> Of 149 patients with multiple CeAD in CADISP study, 19 patients had triple or quadruple CeAD, resulting in 130 with double dissection.

<sup>c</sup> Calculated from data of 96 patients (current study), 964 patients (CADISP).

<sup>d</sup> Time to last clinical follow-up: current study median 4 months (range 0-98), CADISP 3 months.

CeAD, cervical artery dissection.

## References in Table

1. Béjot Y, Aboa-Aboulé C, Debette S, *et al.* Characteristics and outcomes of patients with multiple cervical artery dissection. *Stroke* 2014;45:37-41.
